# Supplementary material for: Phase 1, dose-escalation study of guadecitabine (SGI-110) in combination with pembrolizumab in patients with solid tumors
Source: PubMed Central journal article supplement — J Immunother Cancer. 2022 Jun 8;10(6):e004495. doi: 10.1136/jitc-2022-004495 (PMC9240883; doi:10.1136/jitc-2022-004495), 2022-06-08

## Supplementary Figure 1: Samples available for biomarker analyses passing quality control

*PD-L1: programmed death ligand 1, RNA:  
ribonucleic acid*

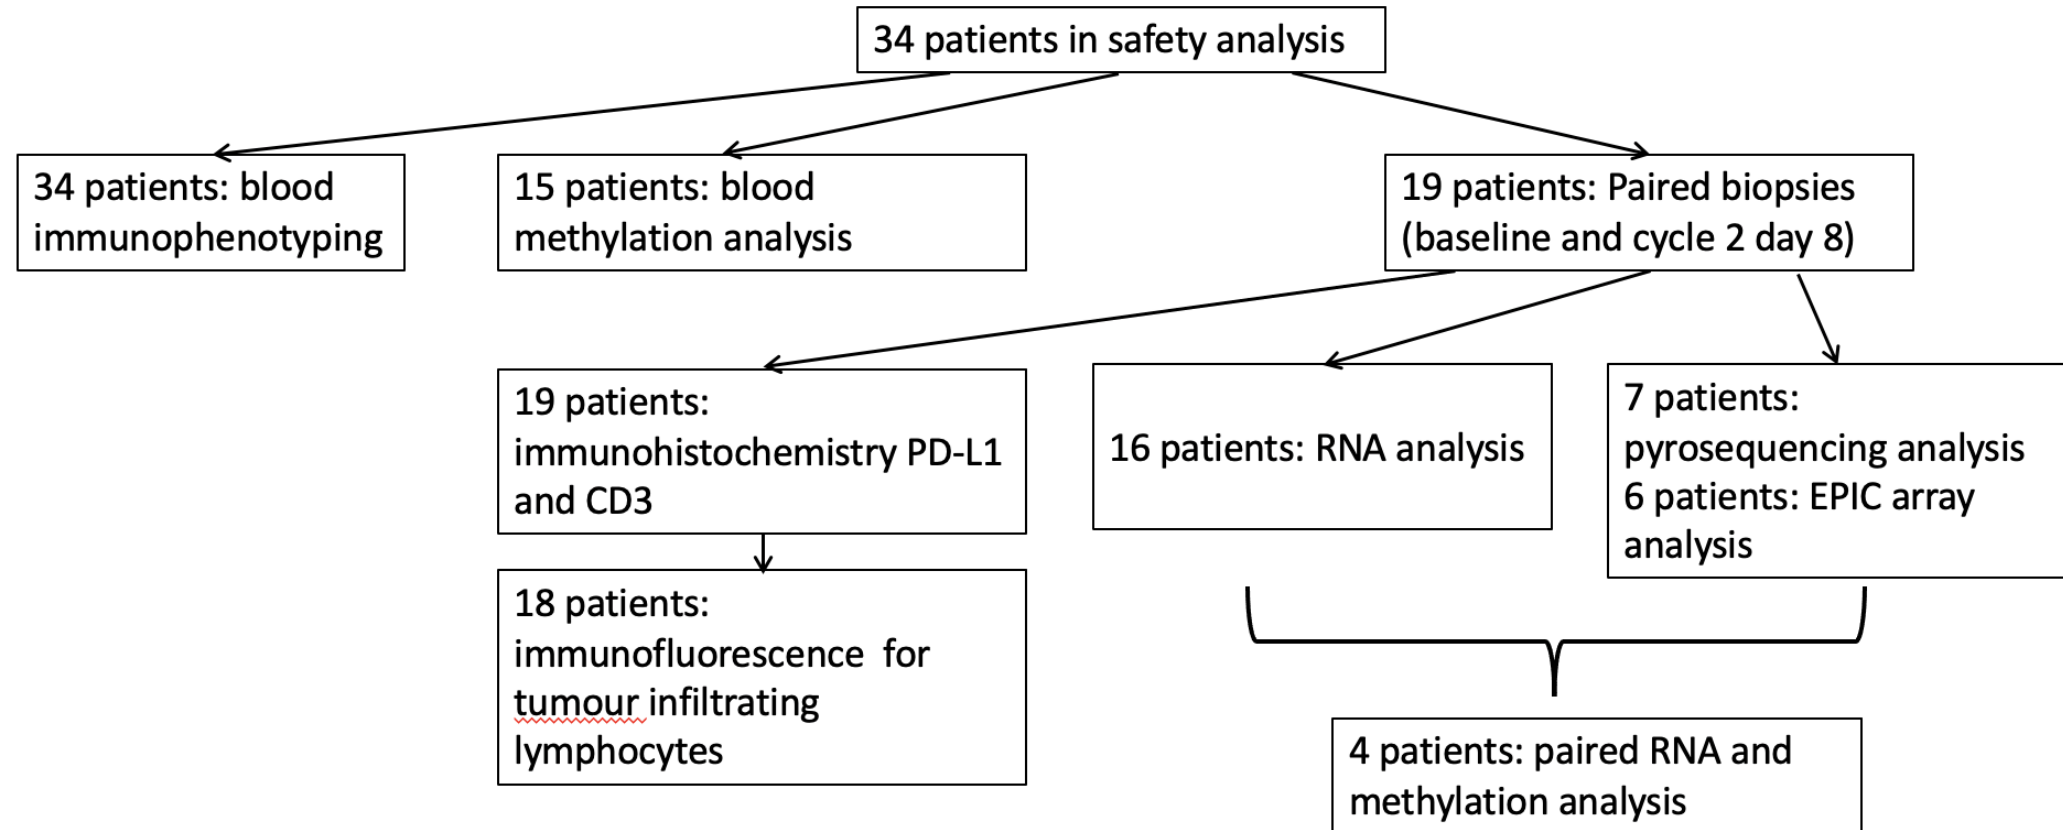

Supplementary Figure 3:  
Correlation of PD-L1 methylation  
with PDL-1 gene expression  
(cg19724470)

Green circle represents baseline  
sample, red circle represents cycle  
2 day 8 sample. Yellow line joins  
samples from same patient.

*FPKM: Fragments Per Kilobase of  
transcript per Million mapped reads,  
PD-L1: programmed death ligand 1*

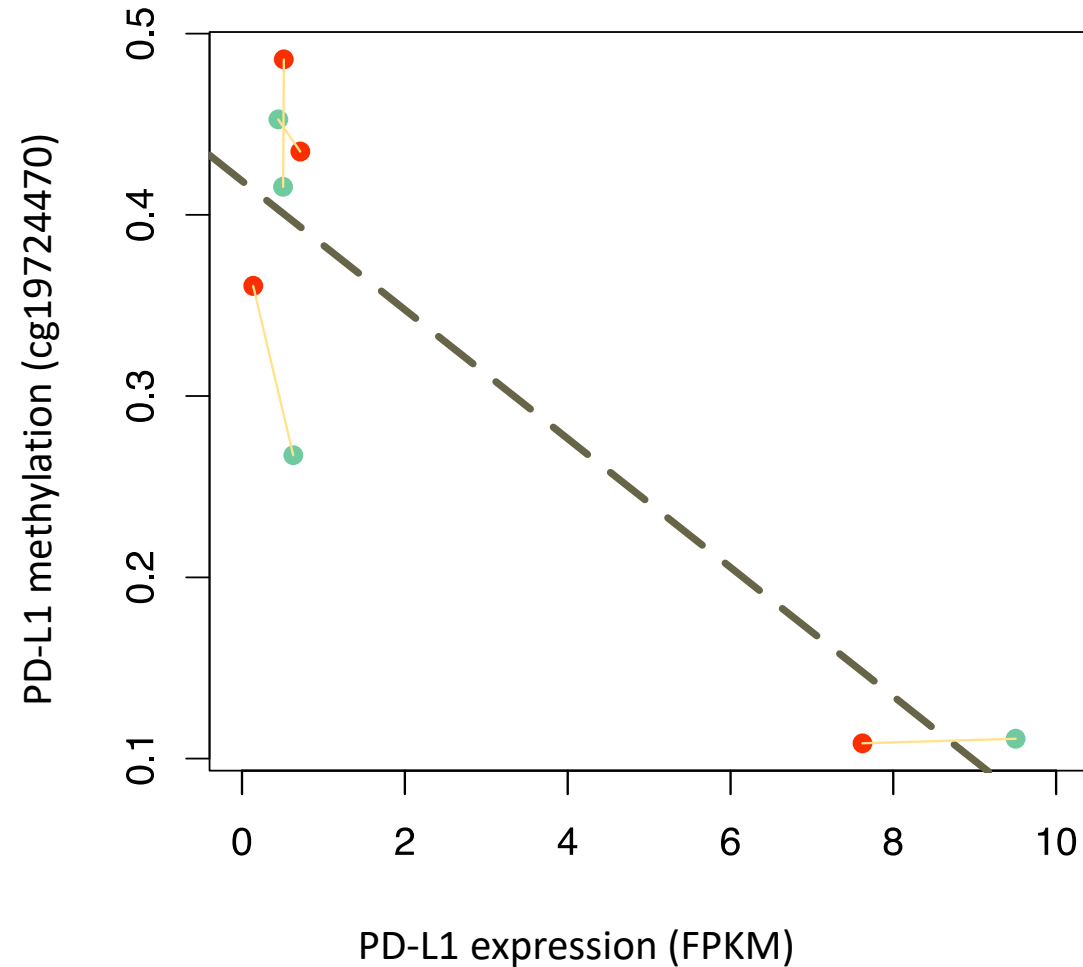

Supplement: jitc-2022-004495supp002.pdf [file jitc-2022-004495supp002.pdf]
