# Supplementary material for: Phase 1, dose-escalation study of guadecitabine (SGI-110) in combination with pembrolizumab in patients with solid tumors
Source: PubMed Central journal article supplement — J Immunother Cancer. 2022 Jun 8;10(6):e004495. doi: 10.1136/jitc-2022-004495 (PMC9240883; doi:10.1136/jitc-2022-004495), 2022-06-08
Supplement: jitc-2022-004495supp003.pdf [file jitc-2022-004495supp003.pdf]

**Supplementary Table 1. Immunomodulatory genes with differentially methylated positions on EPIC array following guadecitabine.***DMP: differentially methylated position, CD: cluster of differentiation, CTA: cancer testis antigen*

| <b>Methylation response</b> | <b>Gene</b>                                          | <b>DMP</b>                                           | <b>Category</b>      |
|-----------------------------|------------------------------------------------------|------------------------------------------------------|----------------------|
| Hypermethylated             | CD80                                                 | cg12978275                                           | Immune checkpoint    |
|                             | CD86                                                 | cg01436254<br>cg16331599<br>cg13617155<br>cg13069531 | Immune checkpoint    |
|                             | Wilms' tumour 1 (WT1)                                | cg22533573<br>cg06516124                             | CTA                  |
|                             | Melanoma-associated antigen A4 (MAGEA4)              | cg24137136                                           | CTA                  |
|                             | Synaptonemal complex protein 1 (SYCP1)               | cg10440578                                           | CTA                  |
|                             | Beta-2-microglobulin (B2M)                           | cg18696027                                           | Antigen presentation |
|                             | Interferon gamma receptor 2 (IFNGR2)                 | cg17356733                                           | Interferon pathway   |
| Hypomethylated              | CCCTC-Binding Factor Like (CTCFL)                    | cg25721806                                           | CTA                  |
|                             | G antigen 2A (GAGE2A)                                | cg20503077                                           | CTA                  |
|                             | Placenta-specific protein 1 (PLAC1)                  | cg17073891                                           | CTA                  |
|                             | Synovial sarcoma X breakpoint 4 (SSX4)               | cg26134482                                           | CTA                  |
|                             | Synaptonemal complex protein 1 (SYCP1)               | cg03964233                                           | CTA                  |
|                             | A-kinase anchoring protein 3 (AKAP3)                 | cg07892051                                           | CTA                  |
|                             | Paired-box 8 (PAX8)                                  | cg06881093                                           | CTA                  |
|                             | Preferentially expressed antigen of melanoma (PRAME) | cg22871485                                           | CTA                  |

**Supplementary Table 2: Unbiased gene-set enrichment (GSEA) of gene transcription data***NES: Normalised Enrichment Score***Supplementary Table 2a: Baseline biopsy: Clinical benefit group versus non-clinical benefit group**

| Description                                | Set Size | Enrichment Score | NES        | P value    | Q values   |
|--------------------------------------------|----------|------------------|------------|------------|------------|
| HALLMARK_ALLOGRAFT_REJECTION               | 151      | 0.69788816       | 2.43557885 | 1.00E-10   | 1.63E-09   |
| HALLMARK_INTERFERON_GAMMA_RESPONSE         | 187      | 0.62511124       | 2.22614765 | 1.00E-10   | 1.63E-09   |
| HALLMARK_INTERFERON_ALPHA_RESPONSE         | 94       | 0.62508561       | 2.09187465 | 2.18E-07   | 2.37E-06   |
| HALLMARK_INFLAMMATORY_RESPONSE             | 144      | 0.54622793       | 1.89281382 | 2.08E-06   | 1.36E-05   |
| HALLMARK_IL6_JAK_STAT3_SIGNALING           | 74       | 0.56675501       | 1.83295926 | 0.00027006 | 0.00073436 |
| HALLMARK_TNFA_SIGNALING_VIA_NFKB           | 176      | 0.51020743       | 1.80894753 | 4.79E-06   | 2.60E-05   |
| HALLMARK_IL2_STAT5_SIGNALING               | 165      | 0.4947585        | 1.74065284 | 2.66E-05   | 9.65E-05   |
| HALLMARK_KRAS_SIGNALING_UP                 | 150      | 0.4997351        | 1.73884575 | 2.17E-05   | 8.87E-05   |
| HALLMARK_OXIDATIVE_PHOSPHORYLATION         | 183      | -0.3482923       | -1.7022766 | 3.65E-05   | 0.0001084  |
| HALLMARK_ADIPOGENESIS                      | 179      | -0.3591121       | -1.7681903 | 3.01E-05   | 9.83E-05   |
| HALLMARK_MYOGENESIS                        | 127      | -0.3978844       | -1.8248259 | 1.87E-05   | 8.72E-05   |
| HALLMARK_EPITHELIAL_MESENCHYMAL_TRANSITION | 172      | -0.4044718       | -1.9651526 | 6.44E-07   | 5.26E-06   |
| HALLMARK_ALLOGRAFT_REJECTION               | 151      | -0.4277822       | -2.0199805 | 1.14E-06   | 6.25E-06   |

**Supplementary Table 2b: Baseline biopsy versus cycle 2 day 8 biopsy in responder group**

| Description                        | Set Size | Enrichment Score | NES        | P value    | Q values   |
|------------------------------------|----------|------------------|------------|------------|------------|
| HALLMARK_INTERFERON_GAMMA_RESPONSE | 187      | 0.44618517       | 2.05493132 | 4.78E-07   | 7.80E-06   |
| HALLMARK_KRAS_SIGNALING_UP         | 150      | 0.4579775        | 2.04523091 | 2.51E-06   | 2.73E-05   |
| HALLMARK_ALLOGRAFT_REJECTION       | 151      | 0.45452851       | 2.04410514 | 7.91E-06   | 5.24E-05   |
| HALLMARK_INTERFERON_ALPHA_RESPONSE | 94       | 0.47994202       | 2.00335921 | 0.00010636 | 0.00043386 |
| HALLMARK_COAGULATION               | 89       | 0.42793624       | 1.76399734 | 0.00294479 | 0.00800775 |
| HALLMARK_MTORC1_SIGNALING          | 192      | -0.3624494       | -1.5380851 | 0.00206268 | 0.00611895 |
| HALLMARK_G2M_CHECKPOINT            | 186      | -0.3787977       | -1.5948275 | 0.00139287 | 0.00454515 |
| HALLMARK_ADIPOGENESIS              | 179      | -0.3918795       | -1.6476085 | 0.00091934 | 0.00333328 |
| HALLMARK_E2F_TARGETS               | 195      | -0.4295767       | -1.8274382 | 1.12E-05   | 5.24E-05   |
| HALLMARK_MYC_TARGETS_V1            | 194      | -0.4389241       | -1.8688391 | 9.87E-06   | 5.24E-05   |
| HALLMARK_MYOGENESIS                | 127      | -0.4937011       | -1.9868303 | 9.77E-06   | 5.24E-05   |
| HALLMARK_OXIDATIVE_PHOSPHORYLATION | 183      | -0.5593859       | -2.3661623 | 1.00E-10   | 3.26E-09   |
