# Supplementary material for: Phase 1, dose-escalation study of guadecitabine (SGI-110) in combination with pembrolizumab in patients with solid tumors
Source: PubMed Central journal article supplement — J Immunother Cancer. 2022 Jun 8;10(6):e004495. doi: 10.1136/jitc-2022-004495 (PMC9240883; doi:10.1136/jitc-2022-004495), 2022-06-08
Supplement: jitc-2022-004495supp004.pdf [file jitc-2022-004495supp004.pdf]

## A Phase 1, Dose Escalation Study of Guadecitabine (SGI-110) in Combination with Pembrolizumab in Patients with Solid Tumours

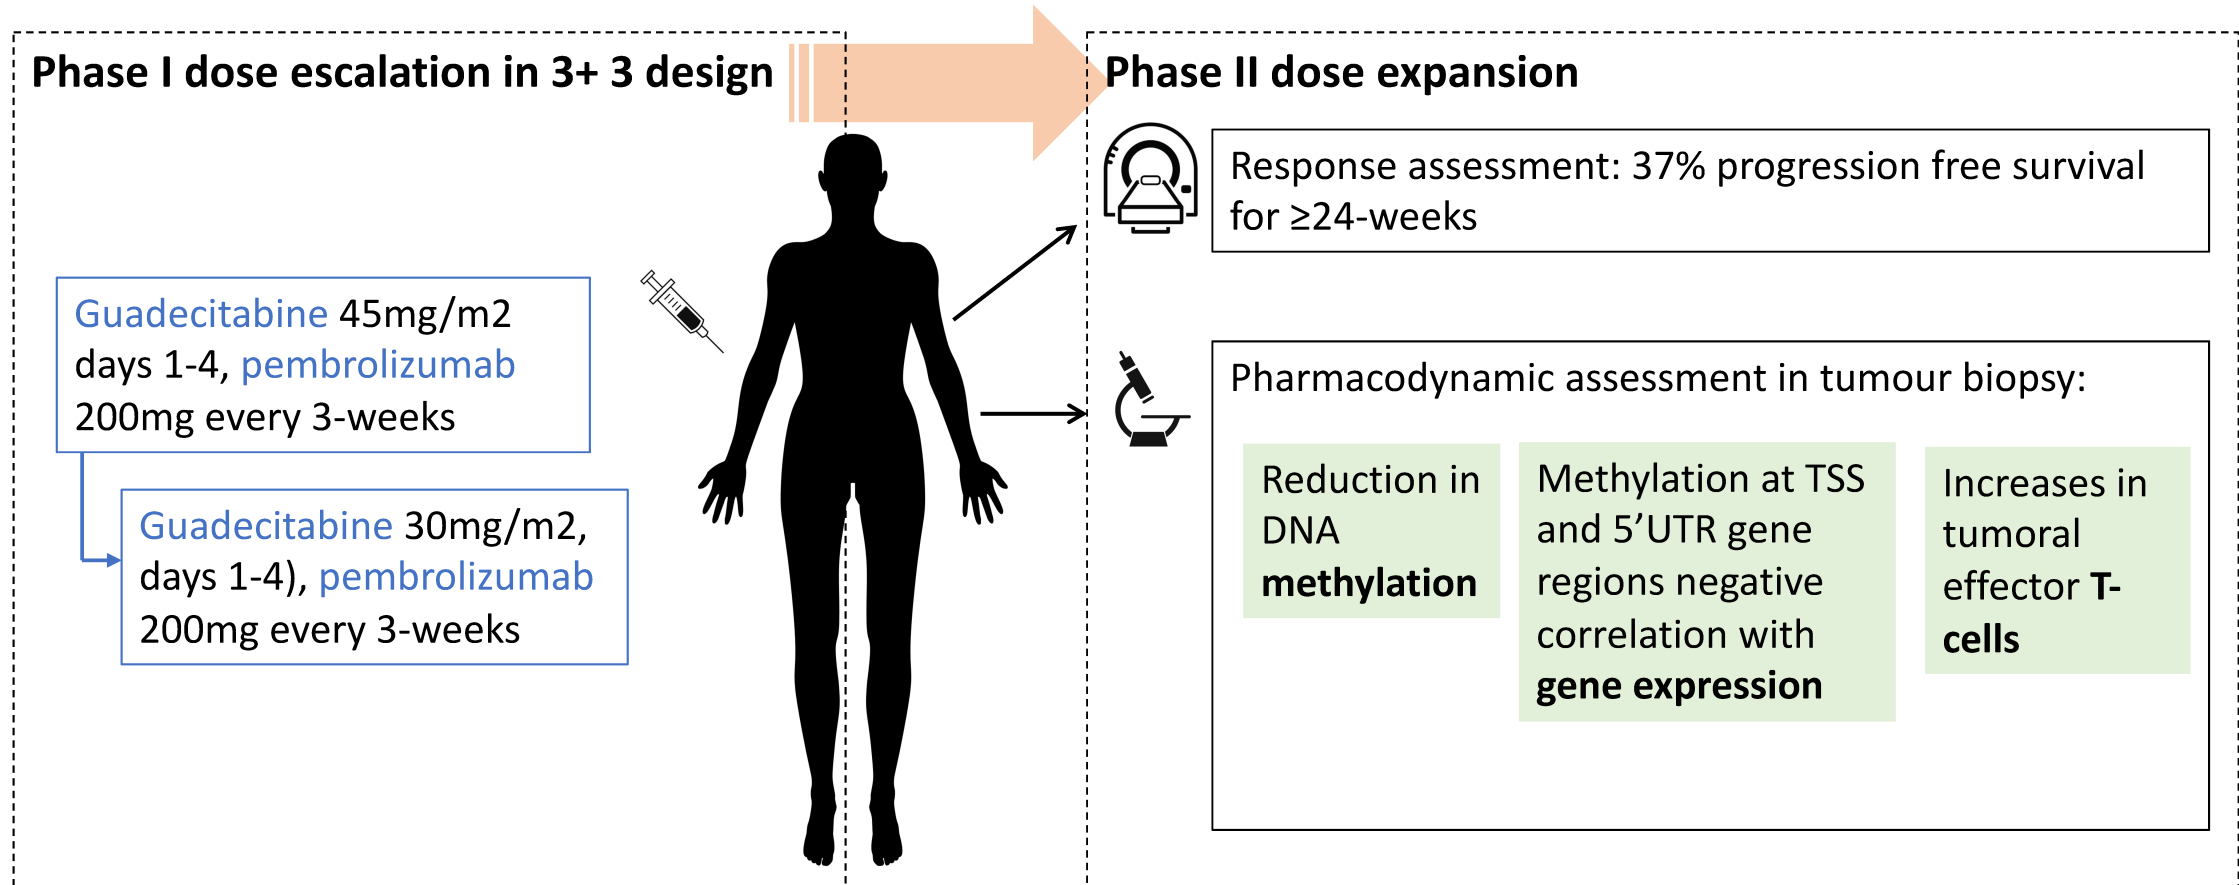

**Authors:** D. Papadatos-Pastos, W. Yuan, A. Pal, M. Crespo, A. Ferreira, B. Gurel, T. Prout, M. Ameratunga, M. Chenard Poirier, A. Curcean, C. Bertan, C. Baker, S. Miranda, N. Masrou, W. Chen, R. Pereira, I. Figueiredo, R. Morilla, B. Jenkins, A. Zachariou, R. Riisnaes, M. Parmar, A. Turner, S. Carreira, C. Yap, R. Brown, N. Tunariu, U. Banerji, J. Lopez, J. de Bono, A. Minchom
